# Supplementary material
Source: HighWire-hosted journal article supplement (https://bmjopen.bmj.com/content/15/4/e084914)
Supplement: inline-supplementary-material-2 [file inline-supplementary-material-2.pdf]

**Satisfaction Survey on Spiritual Care Intervention**

- Instructions:**
- 1. Please select one option for each statement.
  - 2. If you wish to leave a comment, you can use the last column.

| Statement                                                                                                                                                                                                     | Strongly Disagree | Disagree | Neutral | Agree | Strongly Agree | Comment |
|---------------------------------------------------------------------------------------------------------------------------------------------------------------------------------------------------------------|-------------------|----------|---------|-------|----------------|---------|
| The spiritual care program met your expectations.                                                                                                                                                             |                   |          |         |       |                |         |
| The spiritual care volunteer was empathetic and respectful.                                                                                                                                                   |                   |          |         |       |                |         |
| The one-on-one relationship (patient:volunteer) felt appropriate.                                                                                                                                             |                   |          |         |       |                |         |
| The topics discussed during the sessions (e.g., meaning of suffering, uncertainty, death, life after life, ideas about healing, forgiveness, guilt, etc.) addressed your current concerns while hospitalized. |                   |          |         |       |                |         |
| You feel that during the spiritual care sessions you had adequate time to express yourself and ask questions.                                                                                                 |                   |          |         |       |                |         |
| The duration of the spiritual care sessions (approximately 1 hour) was appropriate.                                                                                                                           |                   |          |         |       |                |         |
| The frequency of the spiritual care sessions (every other day) was appropriate.                                                                                                                               |                   |          |         |       |                |         |
| You believe that similar spiritual care programs should be implemented in other hospital services.                                                                                                            |                   |          |         |       |                |         |
| You would recommend this spiritual care program to other ICU patients.                                                                                                                                        |                   |          |         |       |                |         |
